# Supplementary material for: Activation of AMP-Activated Protein Kinase-Sirtuin 1 Pathway Contributes to Salvianolic Acid A-Induced Browning of White Adipose Tissue in High-Fat Diet Fed Male Mice
Source: PubMed Central journal article supplement (PMC8193940; doi:10.3389/fphar.2021.614406), 2021-05-28
Supplement: Image1.pdf [file Image1.pdf]

## Supplementary data

### Figure S1

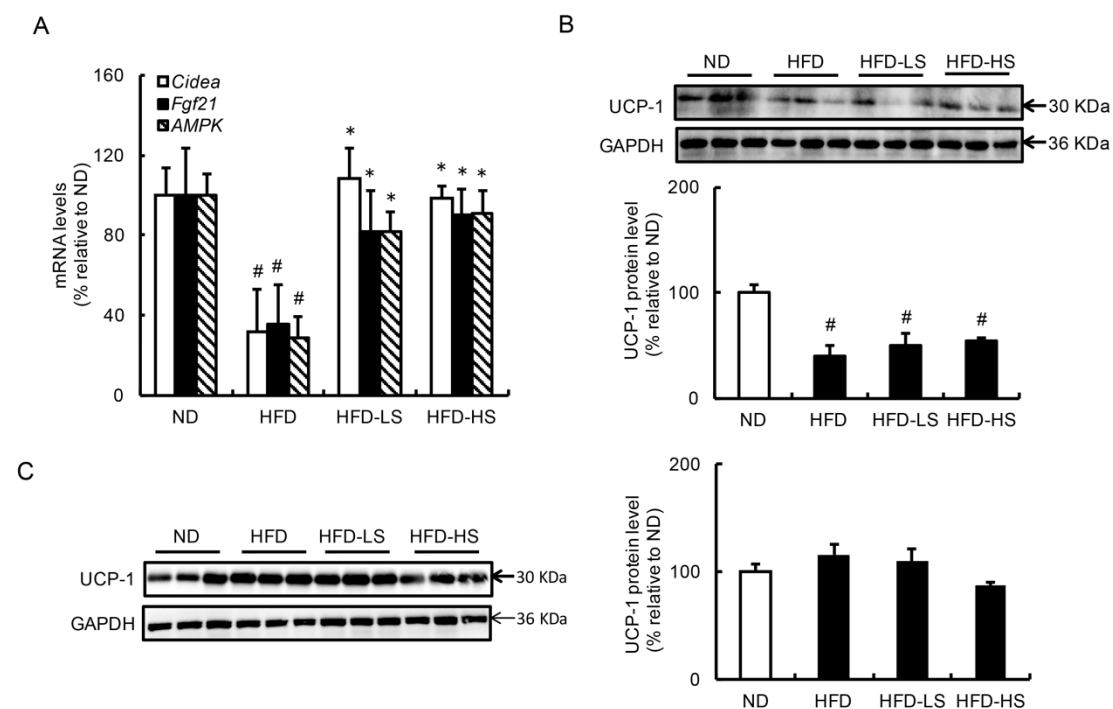

Figure S1. Sal A supplementation improves eWAT browning but not effect UCP-1 in subcutaneous (inguinal) and brown adipose tissues of HFD-fed mice. (A) The gene expressions of *Cidea*, *Fgf21*, and *AMPK* in eWAT. (B) The expression of UCP-1 in subcutaneous (inguinal) adipose tissues was detected by Western blot. (C) Protein expression of UCP-1 in brown adipose tissues. #  $p < 0.05$  versus the ND group; \*  $p < 0.05$  versus the HFD group. All groups contain 12 animals ( $n = 12$ ).
